# Supplementary material
Source: PubMed Central journal article supplement (PMC3282170)
Supplement: NIHMS353137-supplement-01.pdf [file NIHMS353137-supplement-01.pdf]

Figure S1

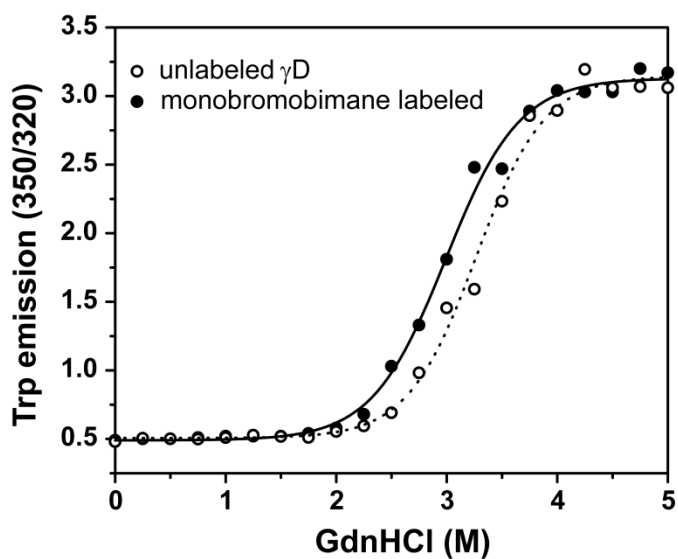

**Supplementary Figure 1.** Effects of bimane labeling on  $\gamma$ D-crystallin stability. The small left shift in denaturant unfolding curves at 25 °C is negligible compared to the shifts introduced by cataract linked mutations.

Figure S2

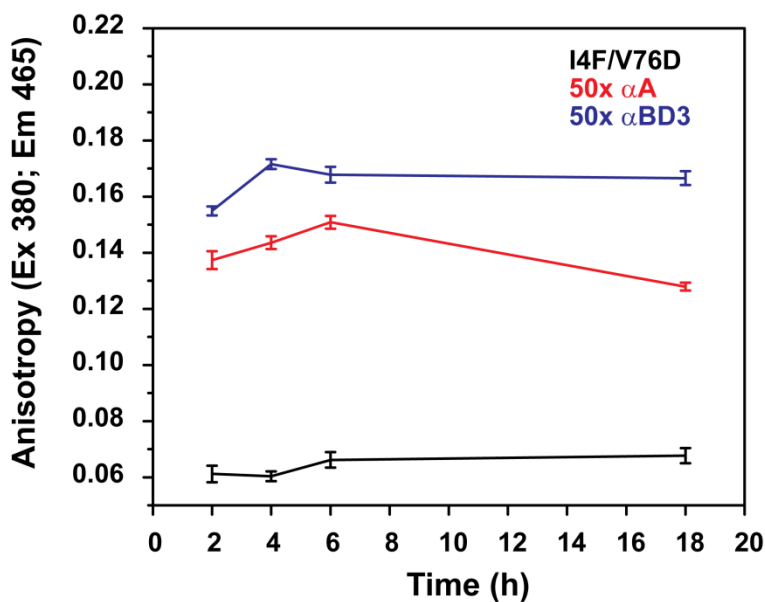

**Supplementary Figure 2.** The lack of large changes in bimane anisotropy demonstrates that binding of  $\gamma$ D-crystallin mutants to  $\alpha$ -crystallin is essentially complete after 2 hours.
